# Supplementary material for: FISH Oracle: a web server for flexible visualization of DNA copy number data in a genomic context
Source: Springer Nature journal article supplement (doi:10.1186/2043-9113-1-20), 2011-01-01
Supplement: 13336_2011_19_MOESM3_ESM.pdf [file 13336_2011_19_MOESM3_ESM.pdf]

Search

Search:

Type:

Region

CNC Stable ID

Gene

Karyoband

less than

greater than:

less than:

Tissue Filter:

1. search menu

2. administration menu

3. result tab and toolbar

Welcome | kras | **pten**

Scroll | Zoom | Chromosome: 10 | Start: 89482733 | End: 90775240 | Less Than: -0.5 | Greater Than: | Export

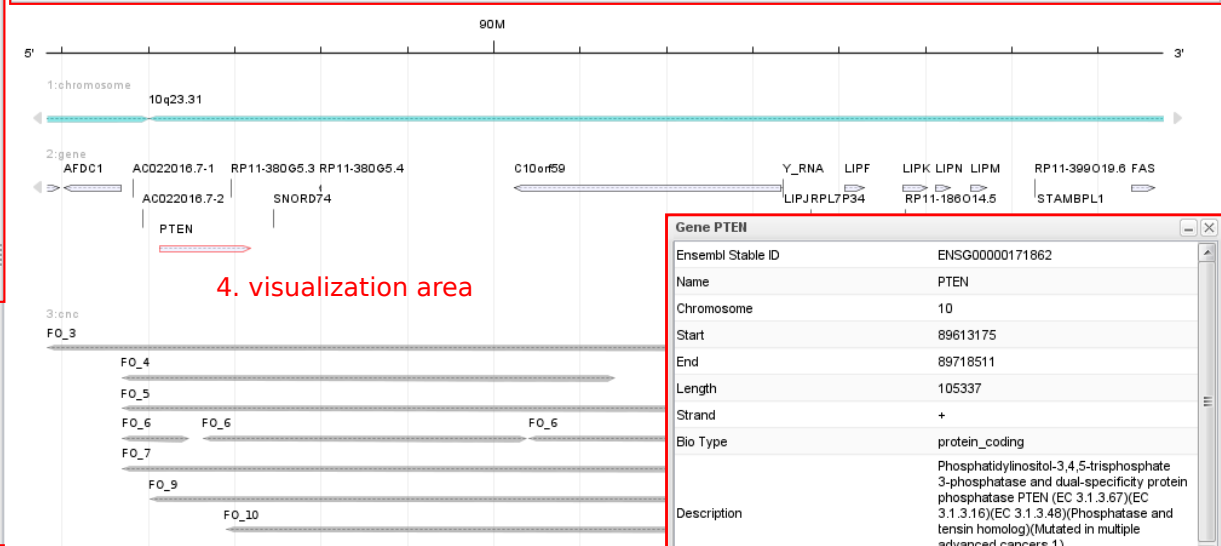

5. feature information pop-up window
