# Supplementary material for: FISH Oracle: a web server for flexible visualization of DNA copy number data in a genomic context
Source: Springer Nature journal article supplement (doi:10.1186/2043-9113-1-20), 2011-01-01

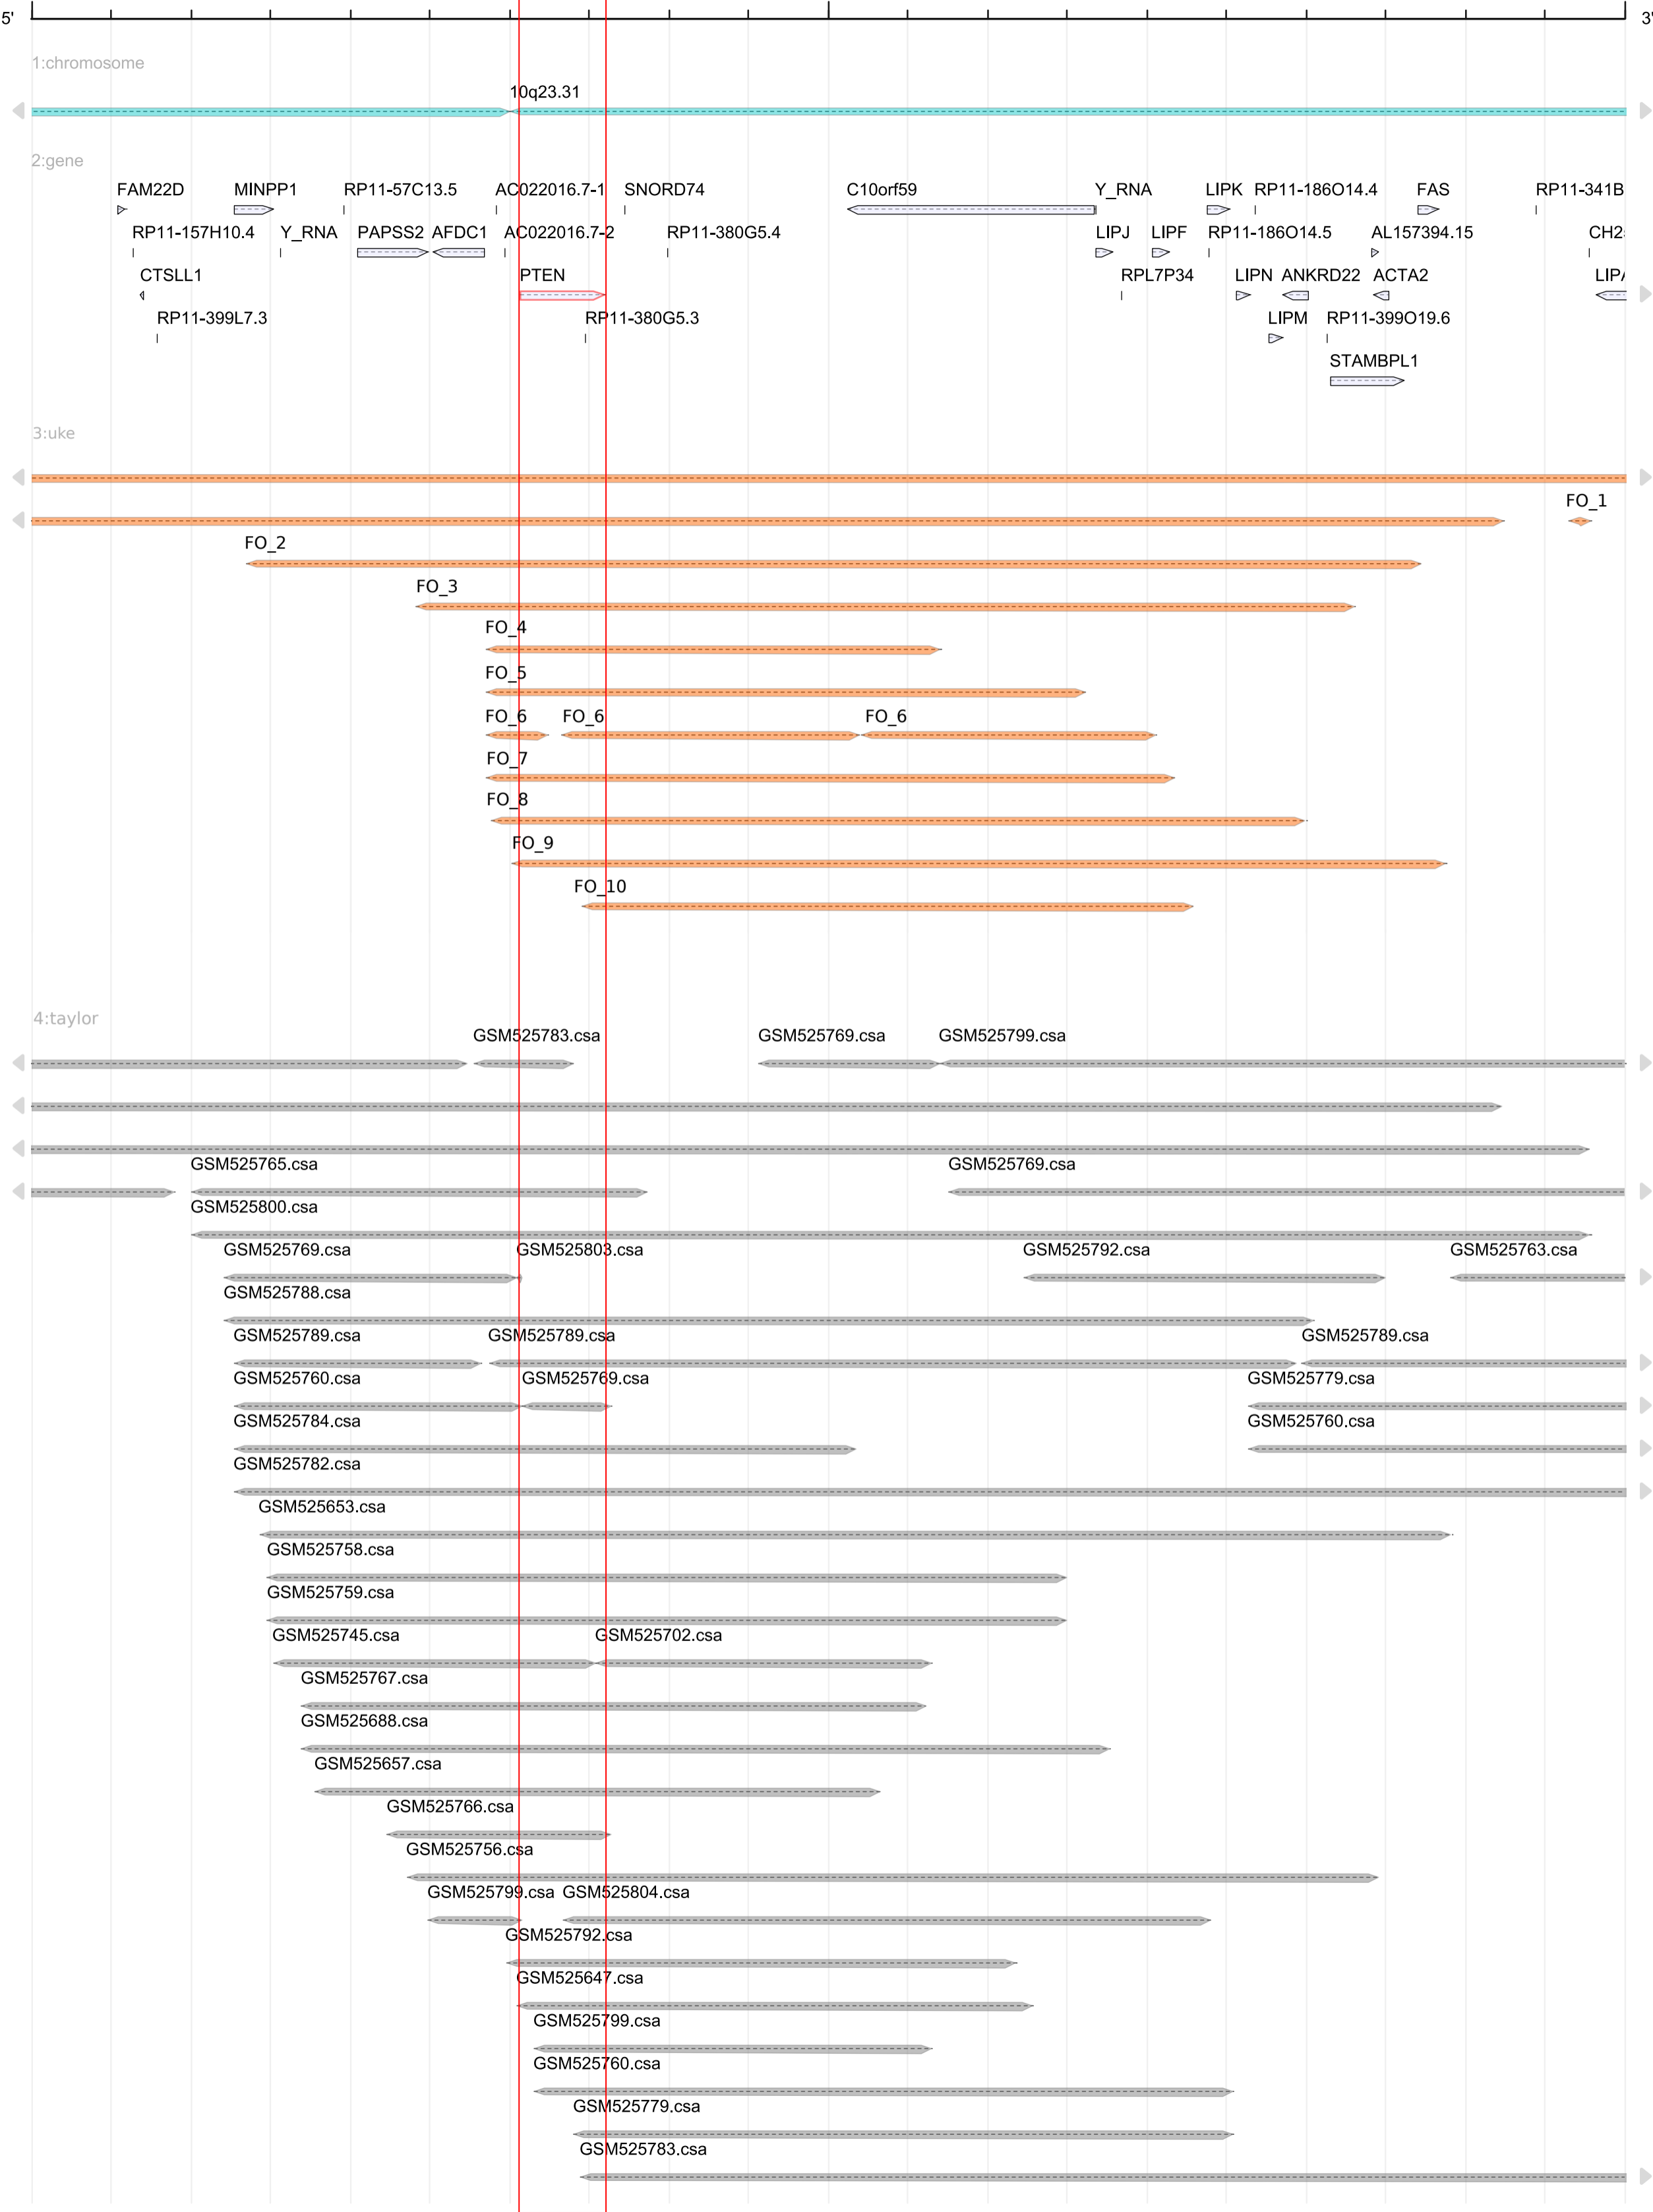

Supplement: 13336_2011_19_MOESM5_ESM.pdf [file 13336_2011_19_MOESM5_ESM.pdf]
