# Supplementary material for: FISH Oracle: a web server for flexible visualization of DNA copy number data in a genomic context
Source: Springer Nature journal article supplement (doi:10.1186/2043-9113-1-20), 2011-01-01

39.0M

40M

41.0M

42.0M

5'

3'

1:chromosome  
21q22.2

21q22.3

2:gene

AP001434.1 AP001037.1 ETS2 RPL23AP12 HMGN1 AF121781.18 IGSF5 PCP4 DSCAM BACE2 FAM3B TMPRSS2

KCNJ15 AP001042.1 AF129408.11 C21orf13B3GALT5 SNORA51 AF064866.2 AL773572.1 MX1 SNORA32

ERG AP001043.2 PSMG1 AF064861.5 C21orf88 AF064863.3-1 MX2

BRWD1 AF064861.93 AF129408.14 RPS26P1 AL773578.1

AF129408.15 AF121897.4

WRB  
SH3BGR

3:uke

4:tailor

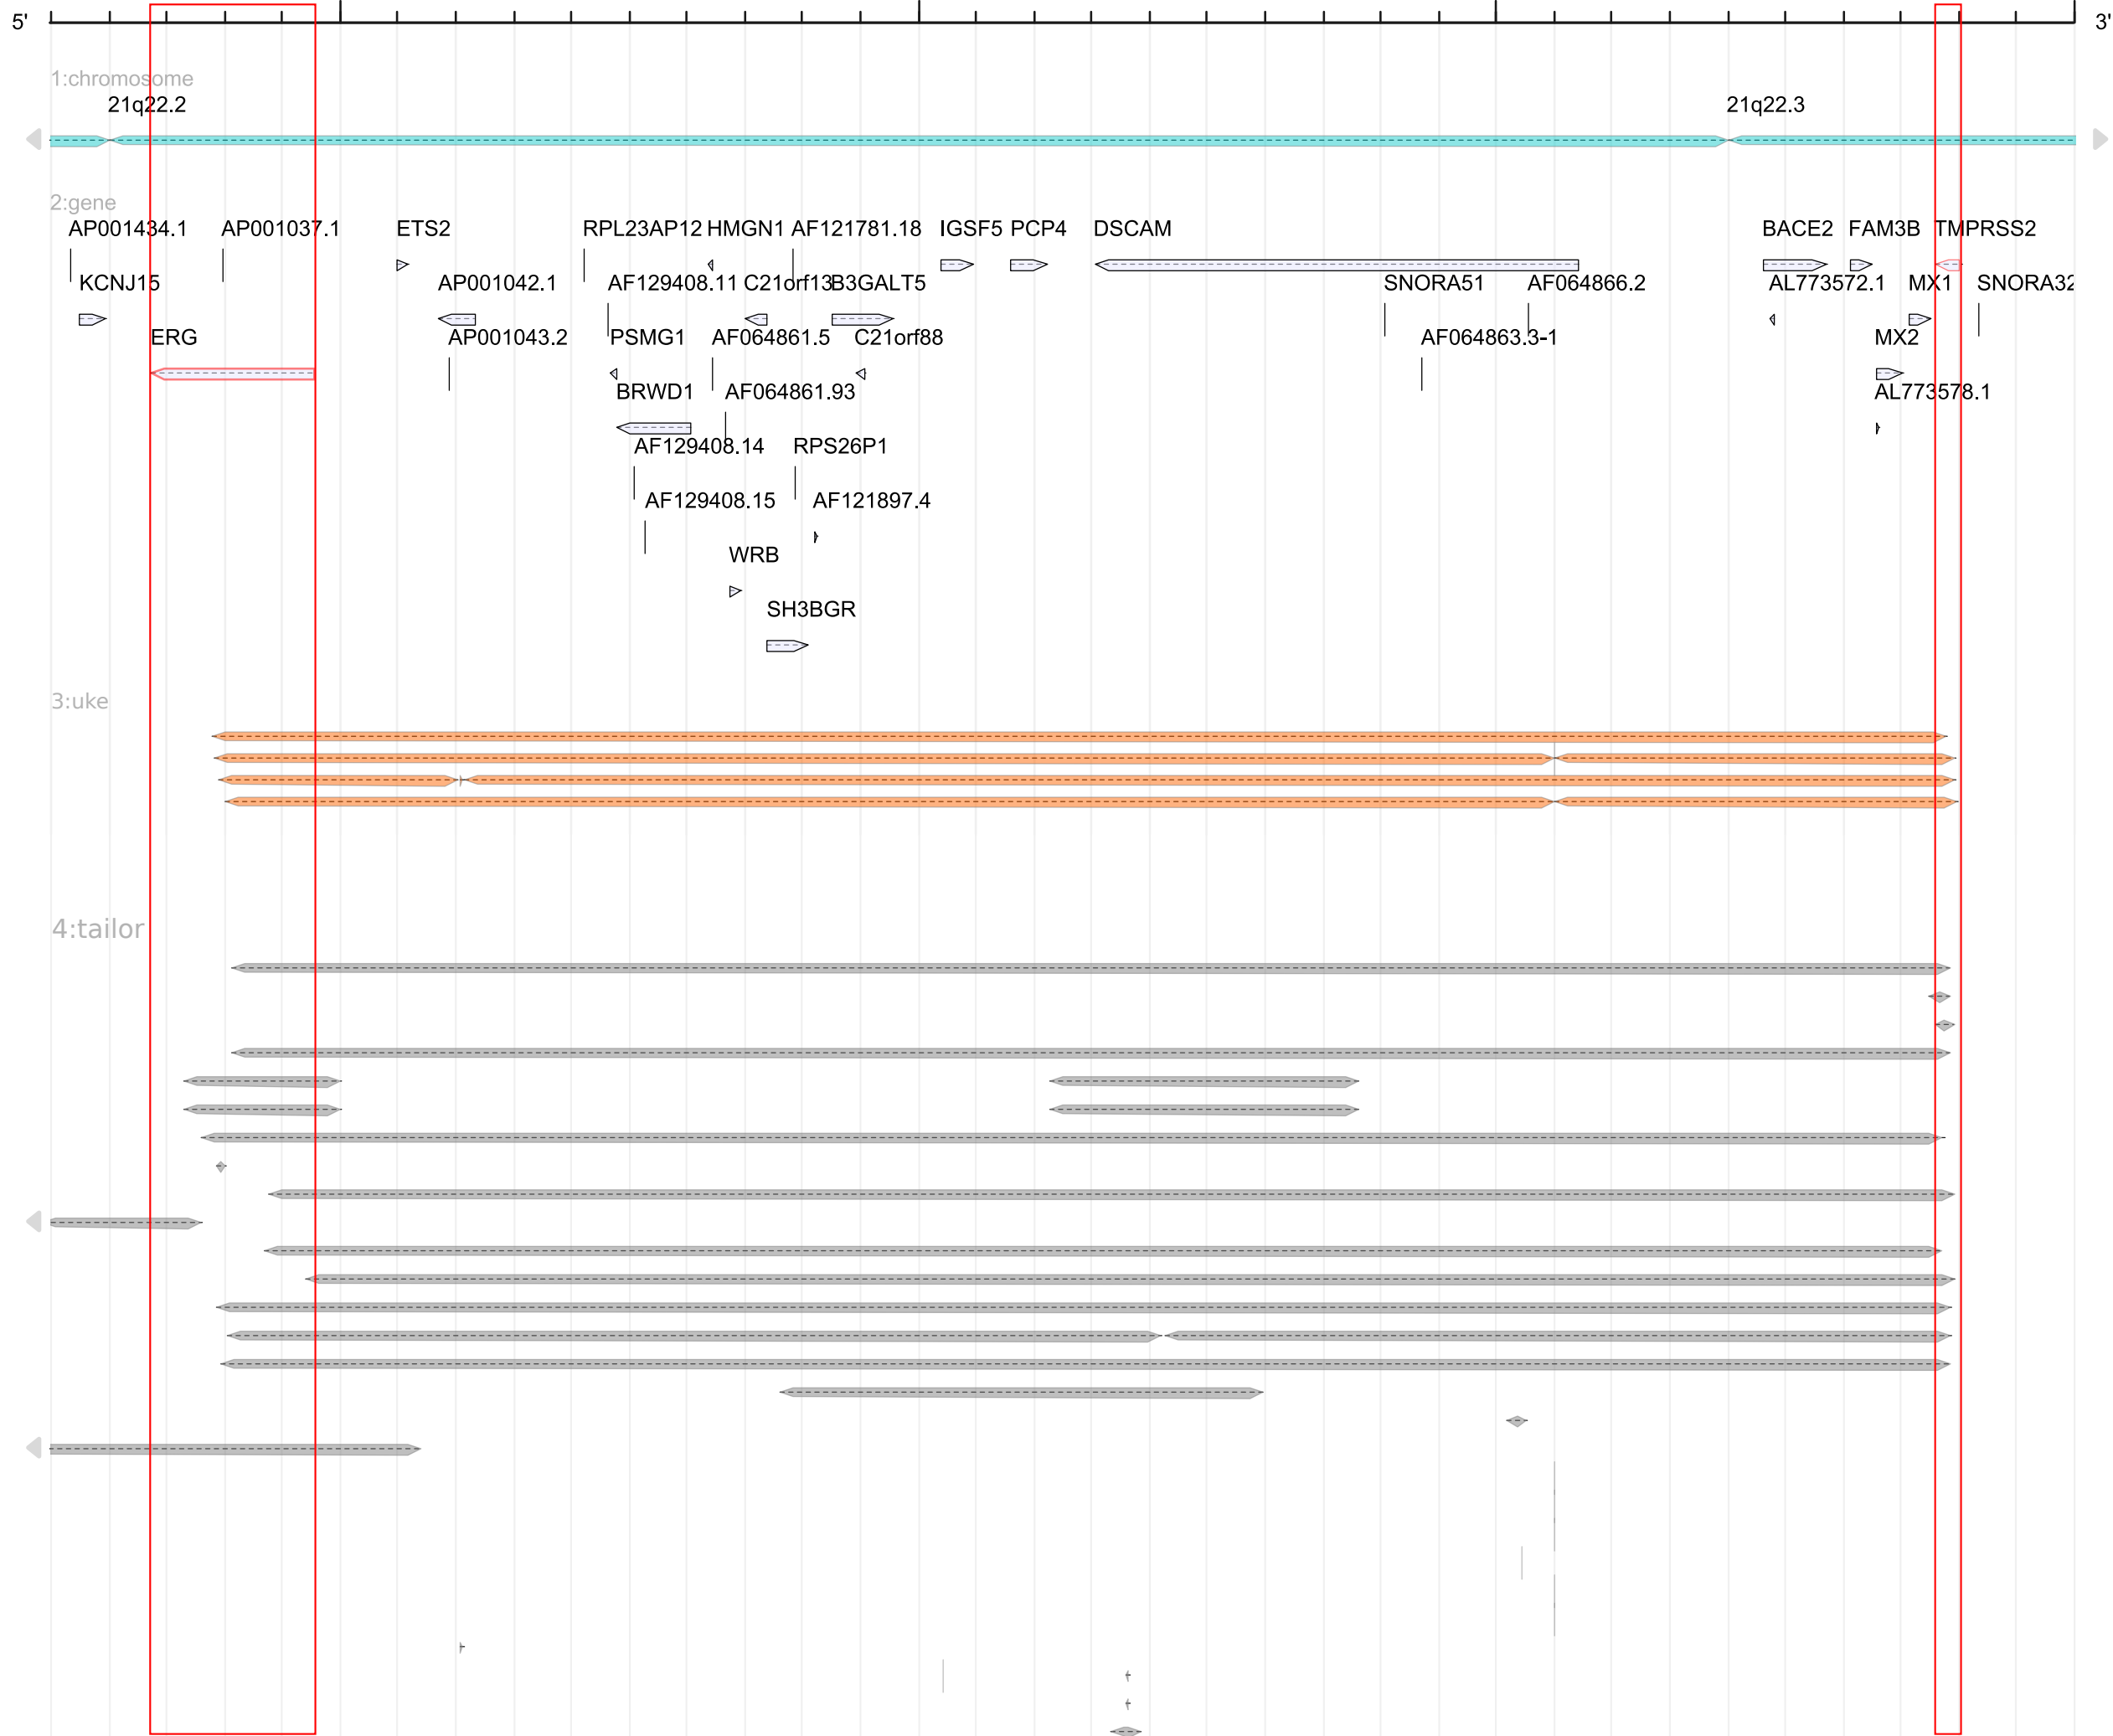

Supplement: 13336_2011_19_MOESM6_ESM.pdf [file 13336_2011_19_MOESM6_ESM.pdf]
