# Supplementary figures and images for: FISH Oracle: a web server for flexible visualization of DNA copy number data in a genomic context
Source: Springer Nature journal article supplement (doi:10.1186/2043-9113-1-20), 2011-01-01

24.0M

25.0M

26.0M

27.0M

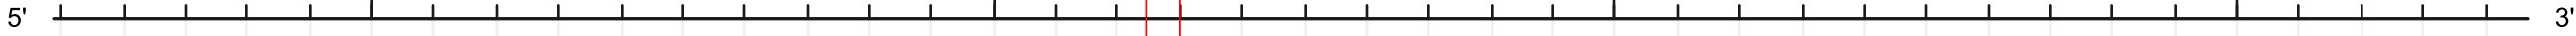

1:chromosome

12p11.23

2:gene

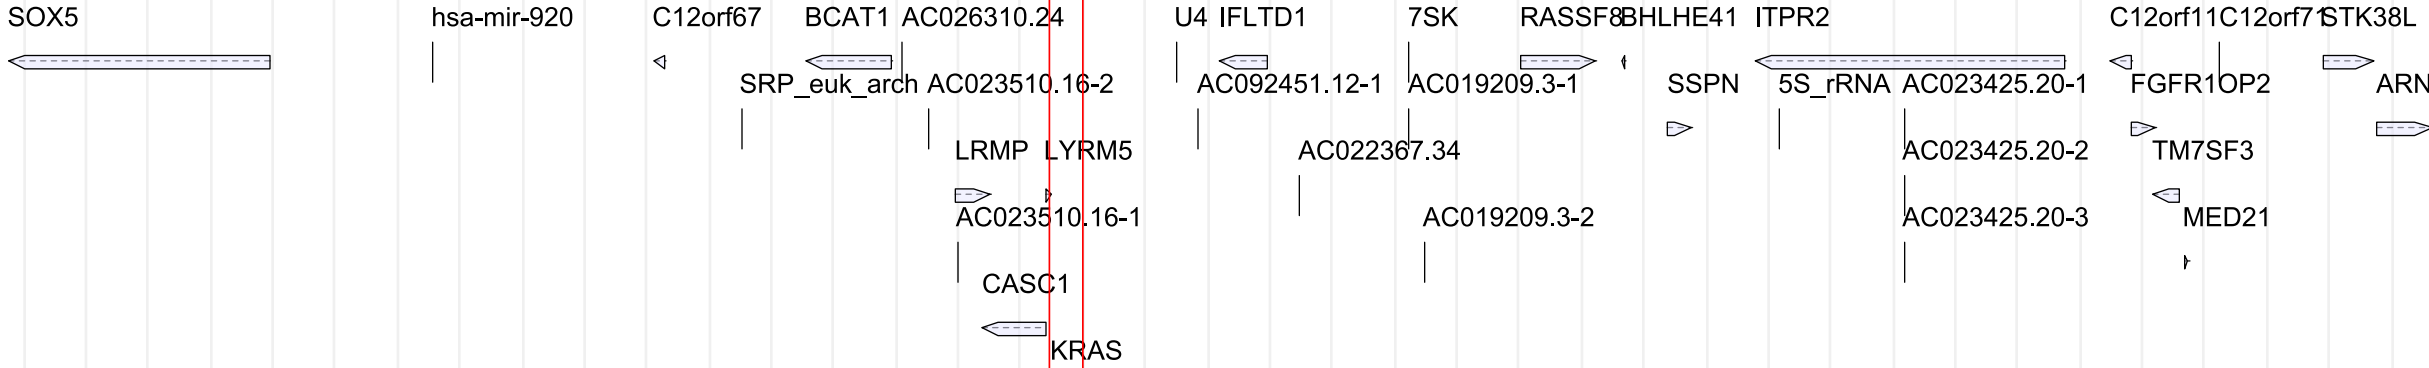

3:cnc

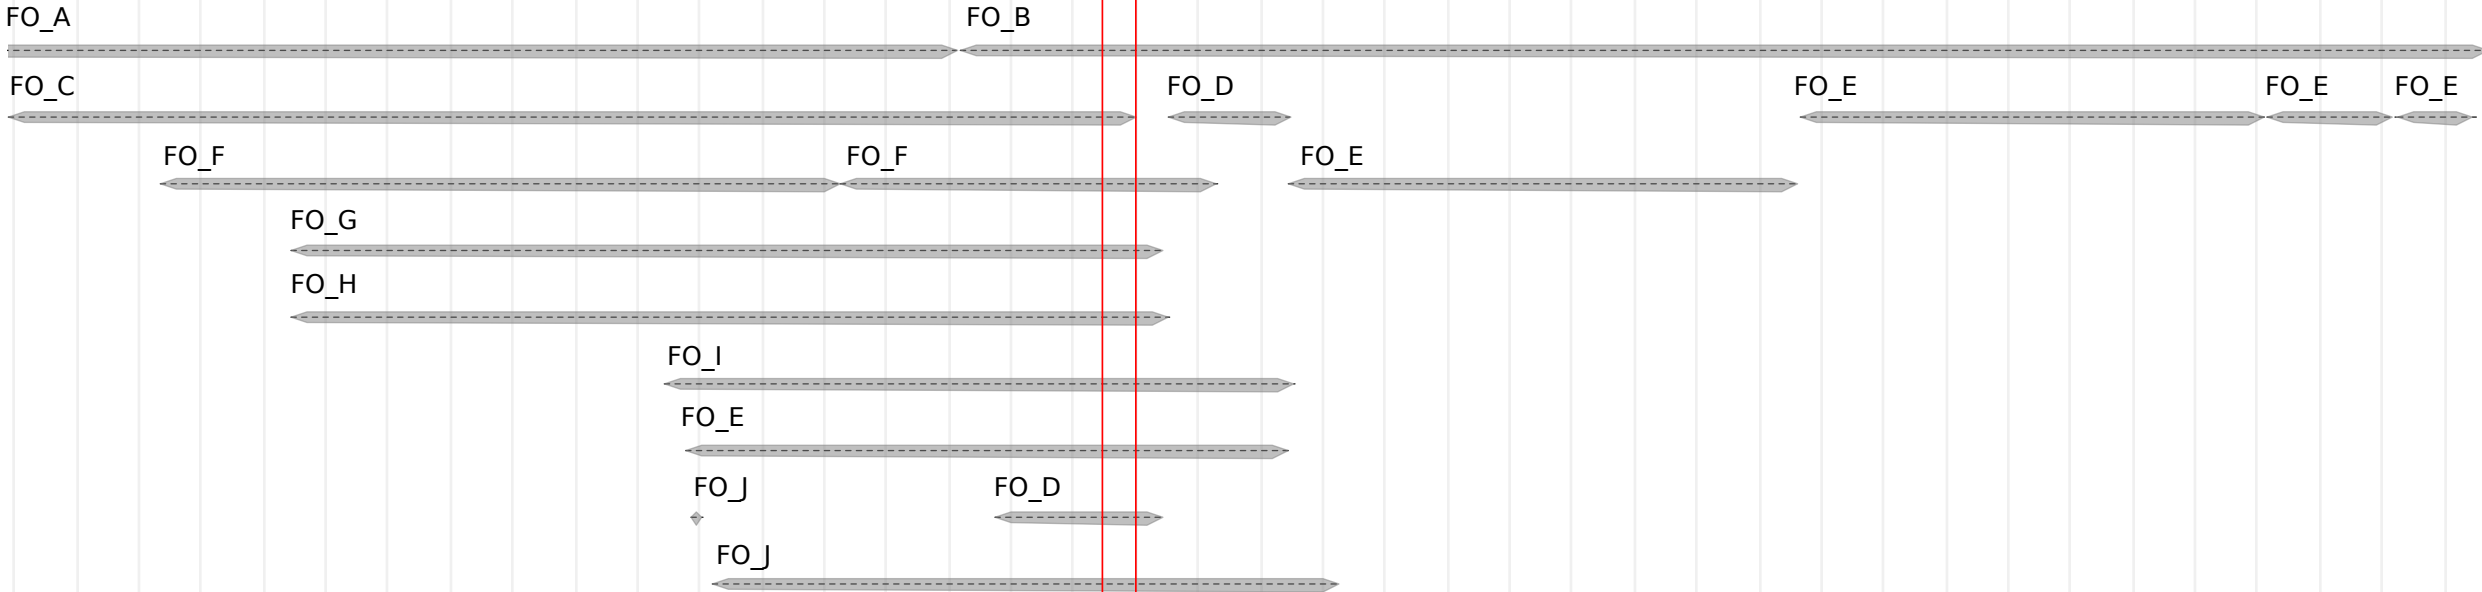

Supplement: 13336_2011_19_MOESM4_ESM.pdf [file 13336_2011_19_MOESM4_ESM.pdf]
